# Supplementary material for: Highly efficient palladium precatalysts of homoscorpionate bispyrazolyl ligands for the more challenging Suzuki–Miyaura cross-coupling of aryl chlorides
Source: Royal Society of Chemistry journal article supplement (doi:10.1039/c003174g), 2010-01-01
Supplement: c003174g.pdf [file c003174g.pdf]

## Supporting Information

# Highly Efficient Palladium Precatalysts of Homoscorpionate Bispyrazolyl Ligands for the More Challenging Suzuki–Miyaura Cross– Coupling of Aryl Chlorides

Alex John,<sup>a</sup> Mobin M. Shaikh,<sup>b</sup> Ray J. Butcher<sup>c</sup> and Prasenjit Ghosh<sup>a\*</sup>

<sup>a</sup>Department of Chemistry and

<sup>b</sup>National Single Crystal X-ray Diffraction Facility,

Indian Institute of Technology Bombay,

Powai, Mumbai 400 076.

<sup>c</sup>Department of Chemistry, Howard University,

525 College Street, NW,

Washington DC 20059, USA.

Email: [pghosh@chem.iitb.ac.in](mailto:pghosh@chem.iitb.ac.in)

Tel.: +91-22-2576-7178; Fax: +91-22-2572-3480

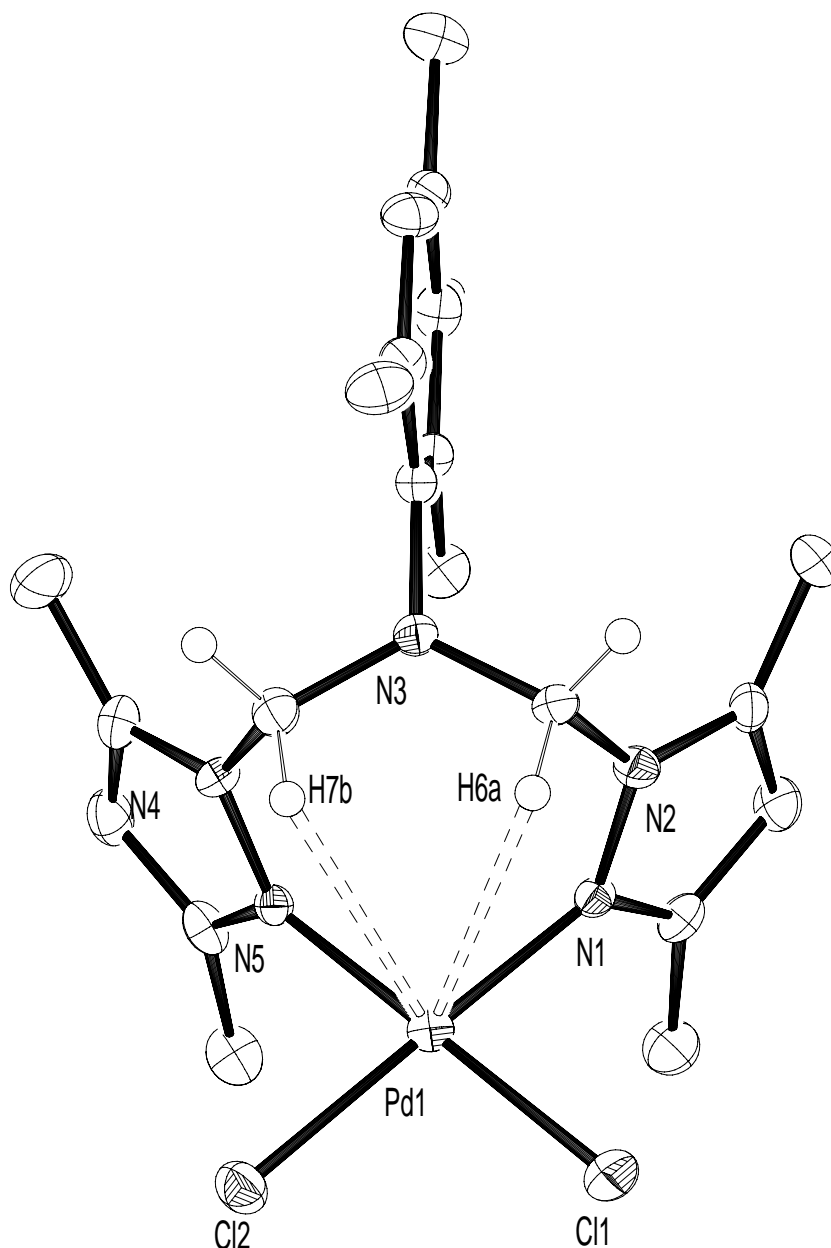

**Figure S1.** ORTEP of **2** shown with 50 % probability ellipsoids. Selected bond lengths (Å) and angles (°): Pd1-N1 2.0448(18), Pd1-N5 2.0459(18), Pd1-Cl1 2.2810(7), Pd1-Cl2 2.2824(8), Pd1-H6A 2.8436, Pd1-H7B 2.8463, N1-N2 1.366(2), N1-Pd1-N5 92.23(7), N1-Pd1-Cl1 88.42(5), N5-Pd1-Cl1 178.84(6), N1-Pd1-Cl2 178.65(5), N5-Pd1-Cl2 88.01(5).

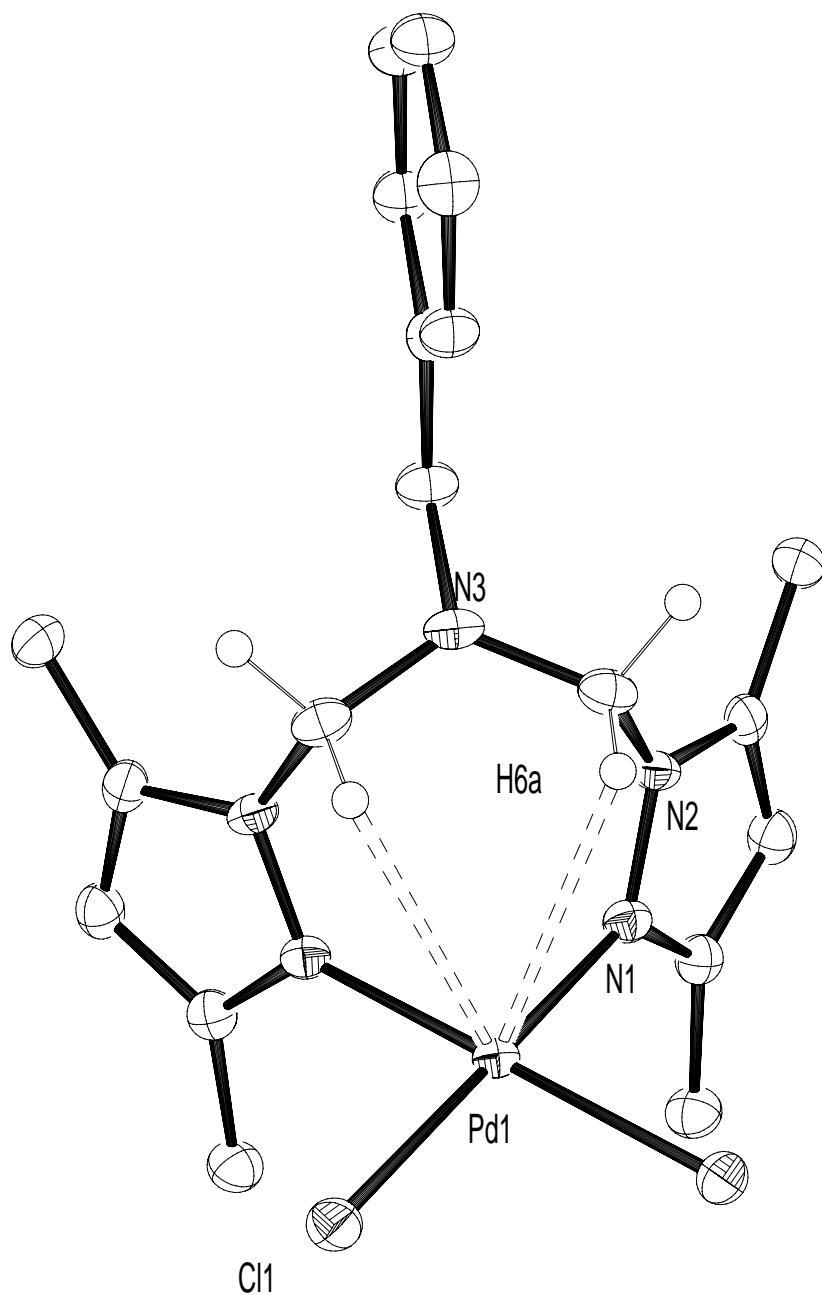

**Figure S2.** ORTEP of **3** shown with 50 % probability ellipsoids. Selected bond lengths (Å) and angles (°): Pd1-N1 2.0217(15), Pd1-C11 2.2866(5), Pd1-H6A 2.8458, N1-N2 1.362(2), N1-Pd1-N1 90.76(9), N1-Pd1-C11 177.99(4), C11-Pd1-C11 92.76(2).

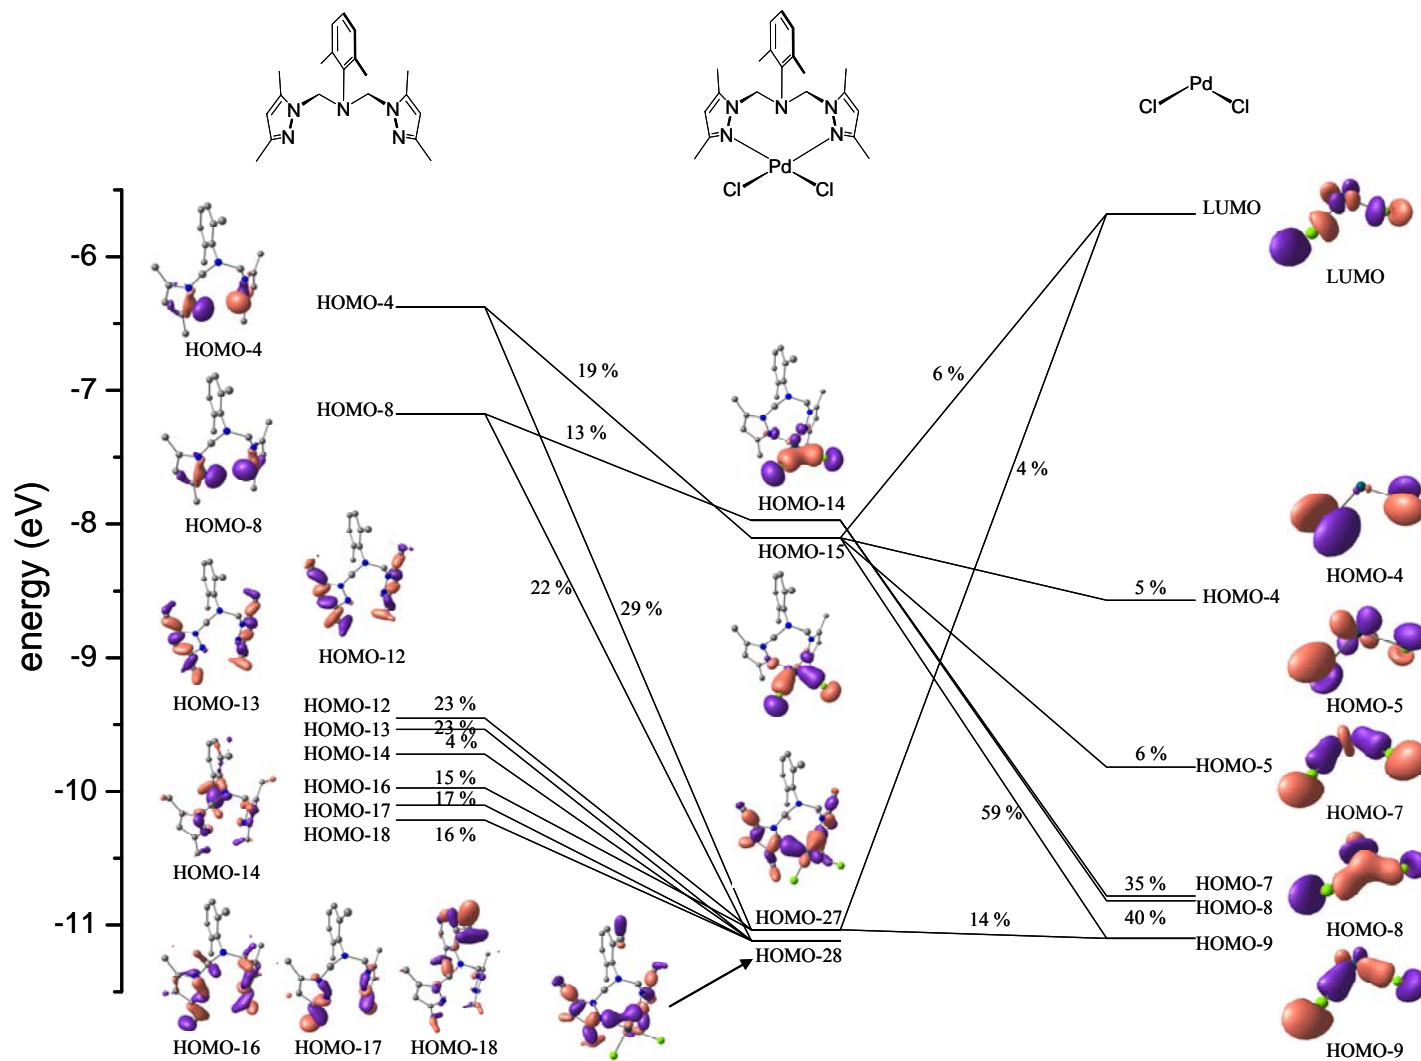

**Figure S3.** Detailed orbital interaction diagram showing major contributions to the pyrazole–palladium bond in **1**.

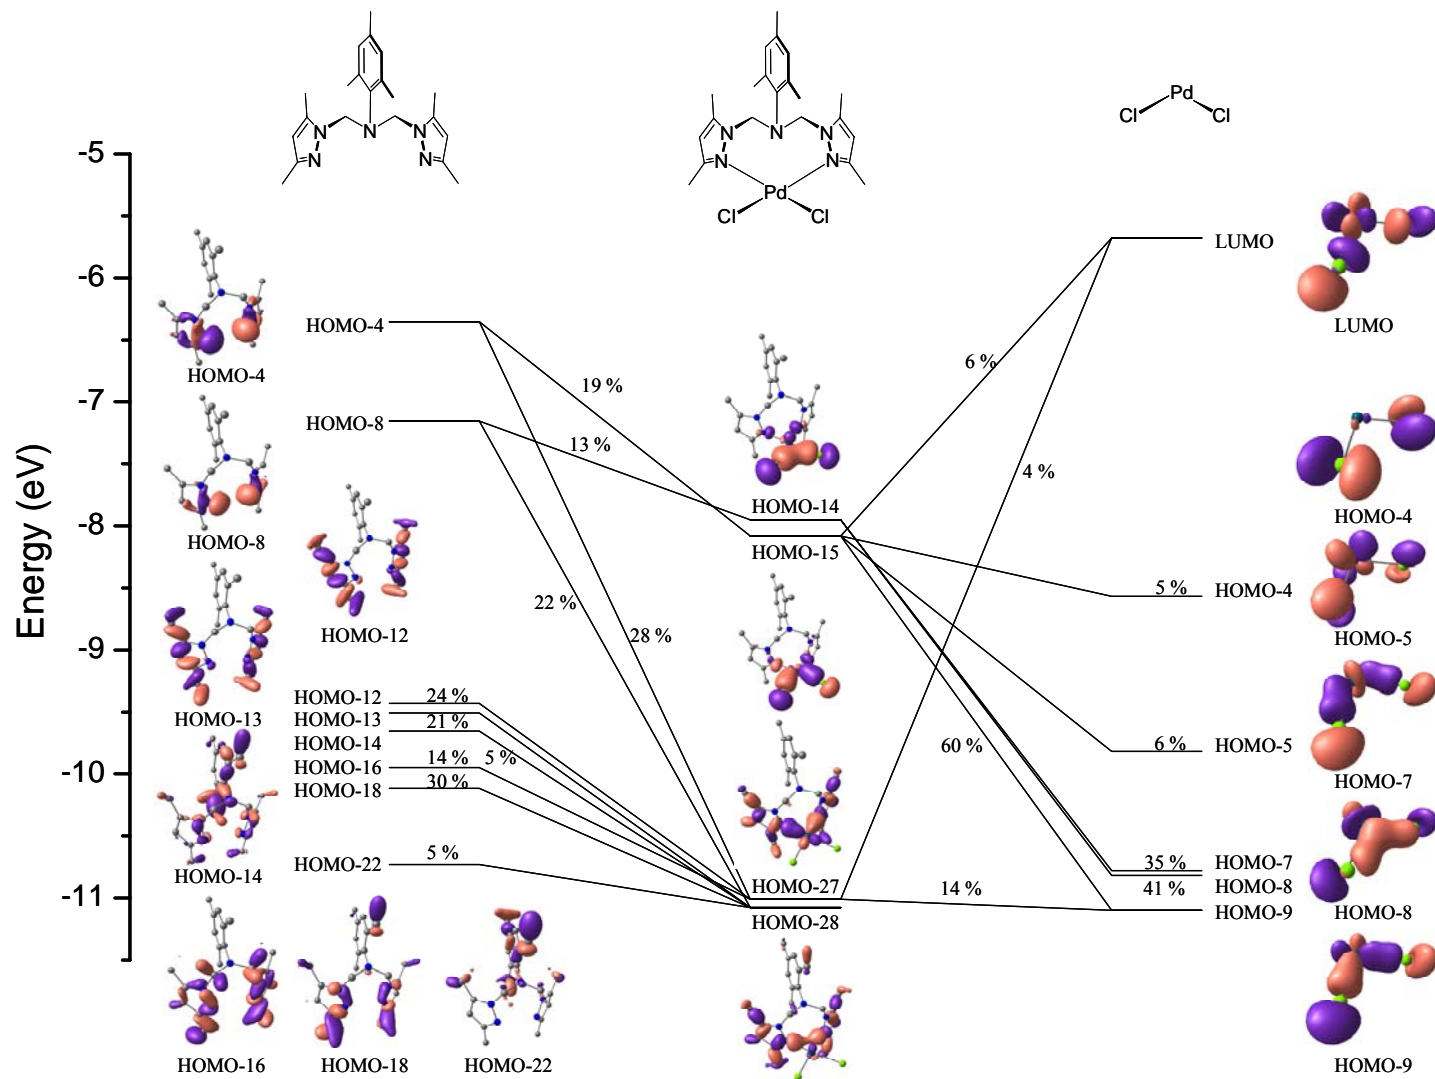

**Figure S4.** Detailed orbital interaction diagram showing major contributions to the pyrazole–palladium bond in **2**.

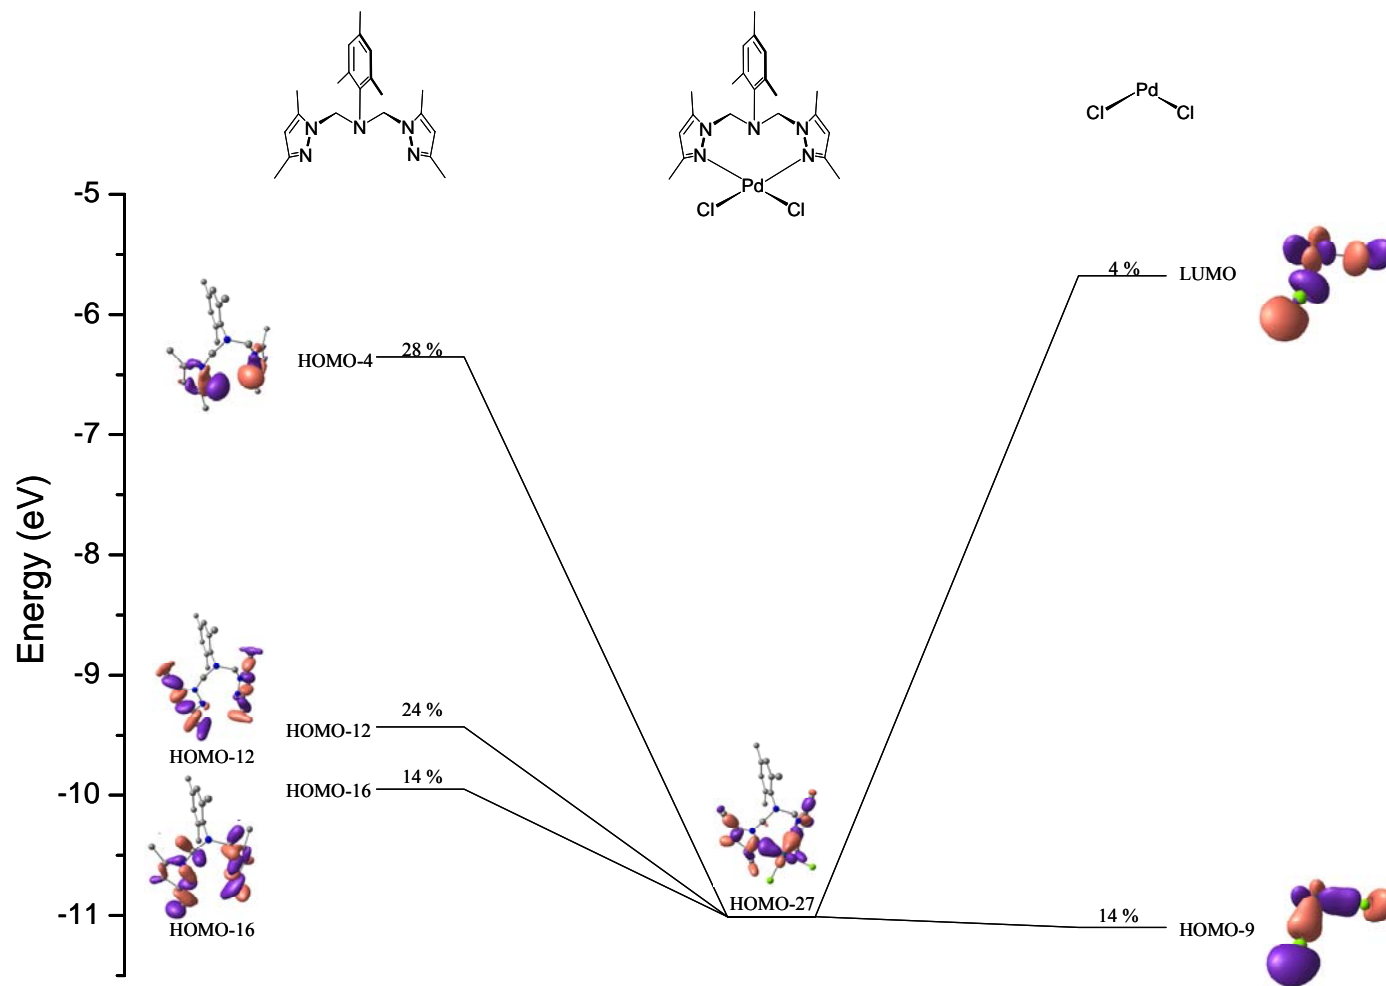

**Figure S5.** Simplified orbital interaction diagram showing major contributions to the pyrazole–palladium bonding orbital HOMO-27 in **2**.

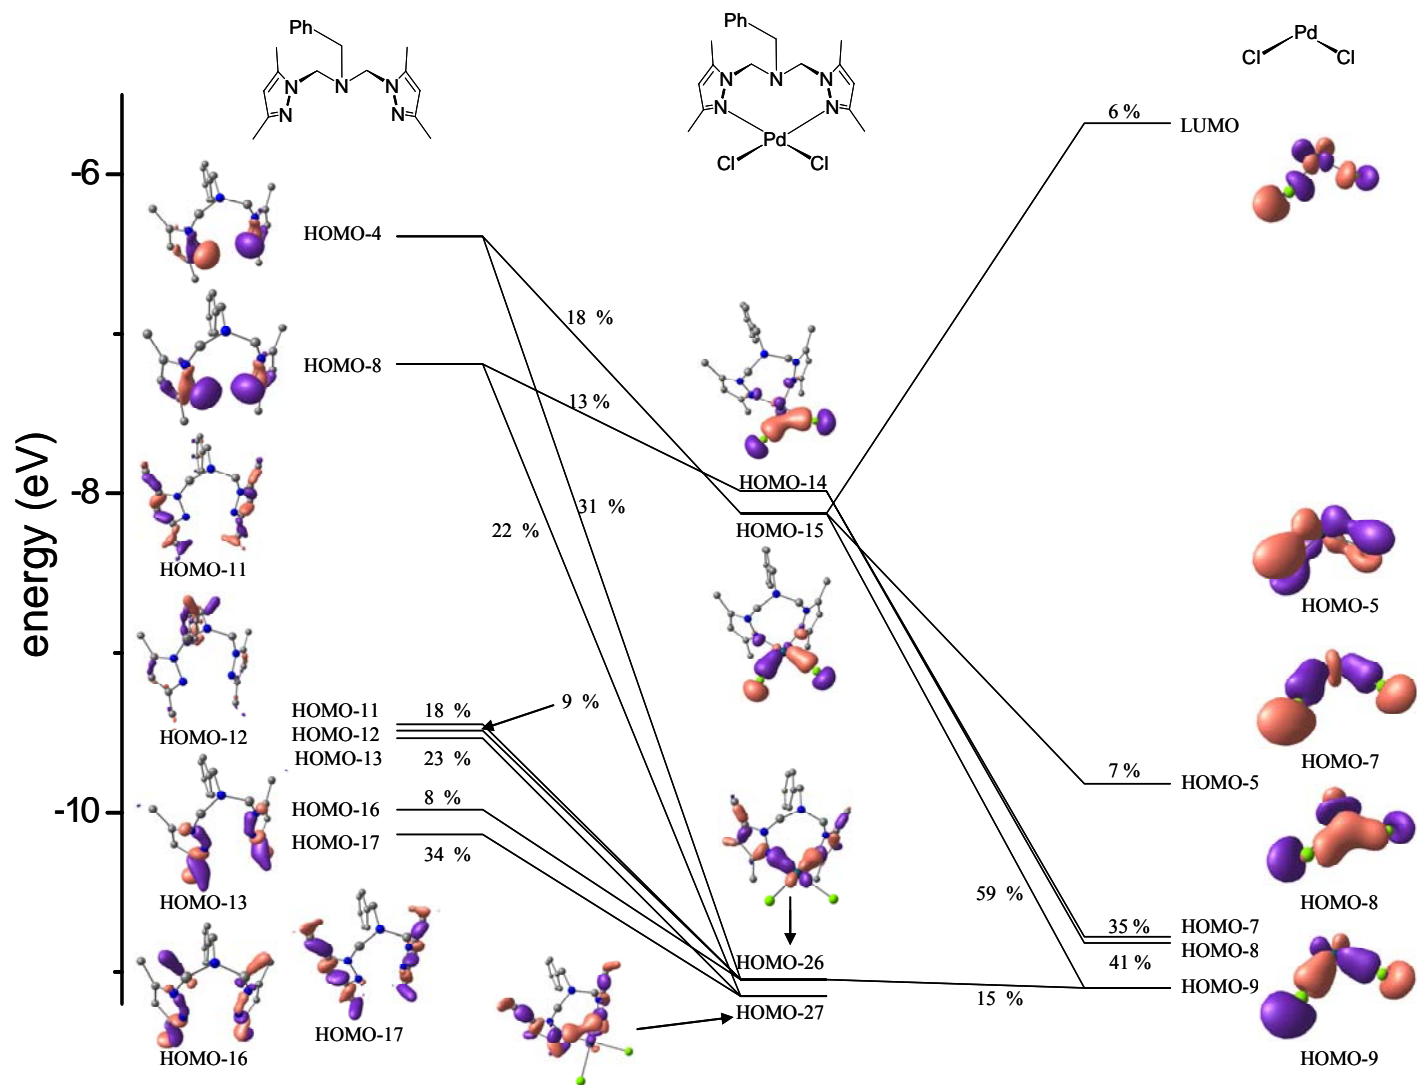

**Figure S6.** Detailed orbital interaction diagram showing major contributions to the pyrazole–palladium bond in **3**.

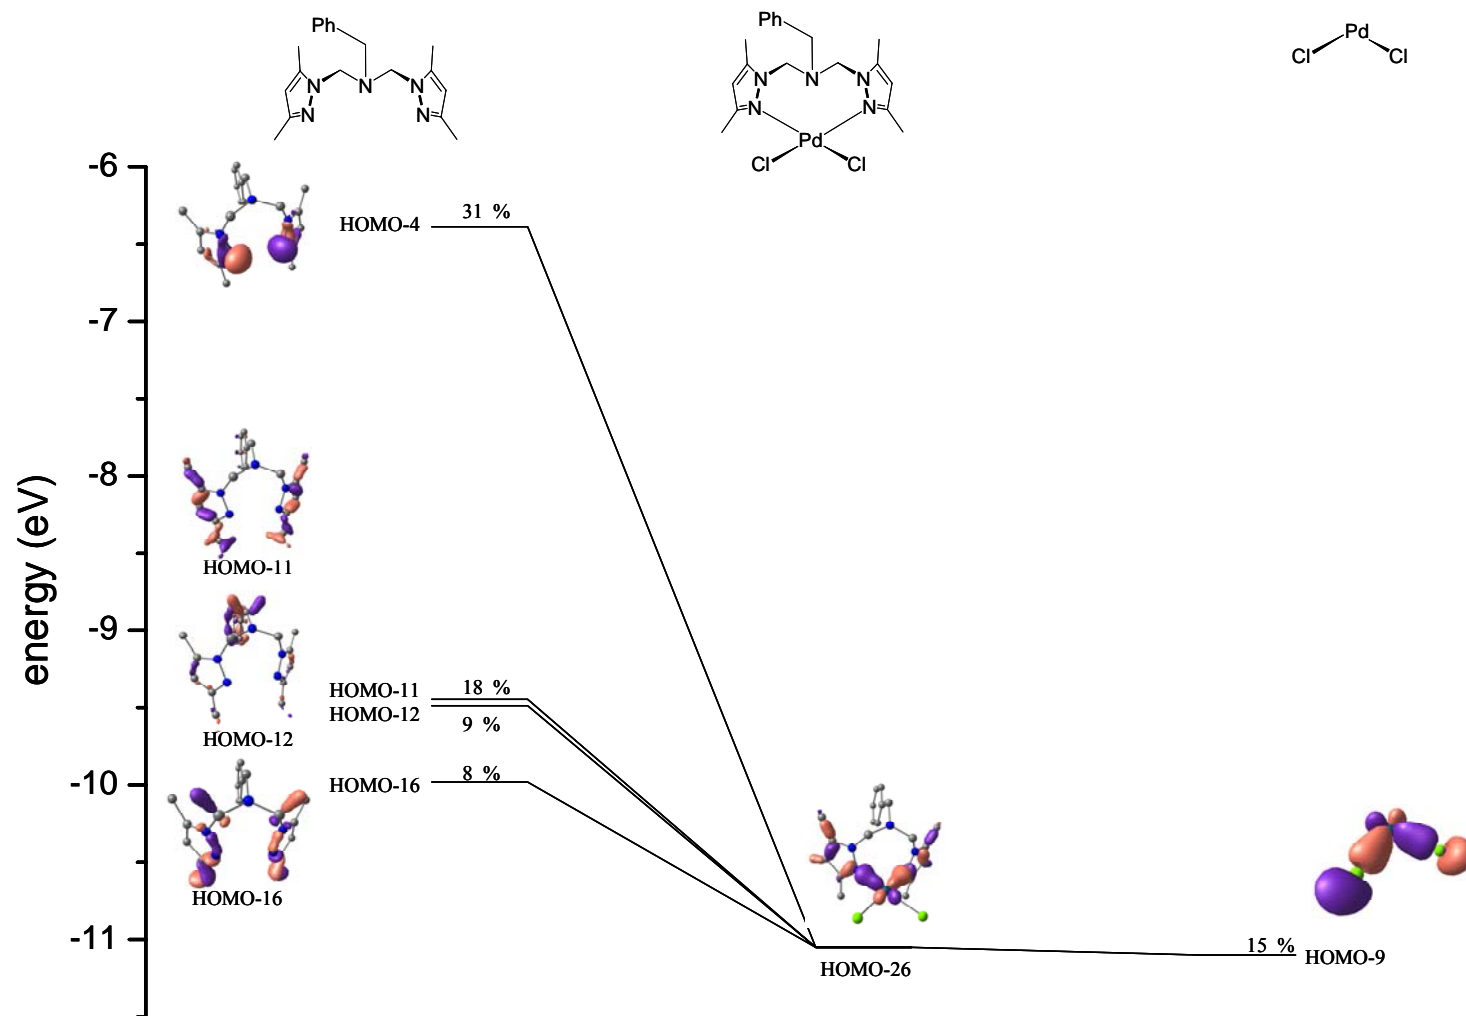

**Figure S7.** Simplified orbital interaction diagram showing major contributions to the pyrazole—palladium bonding orbital HOMO-26 in **3**.



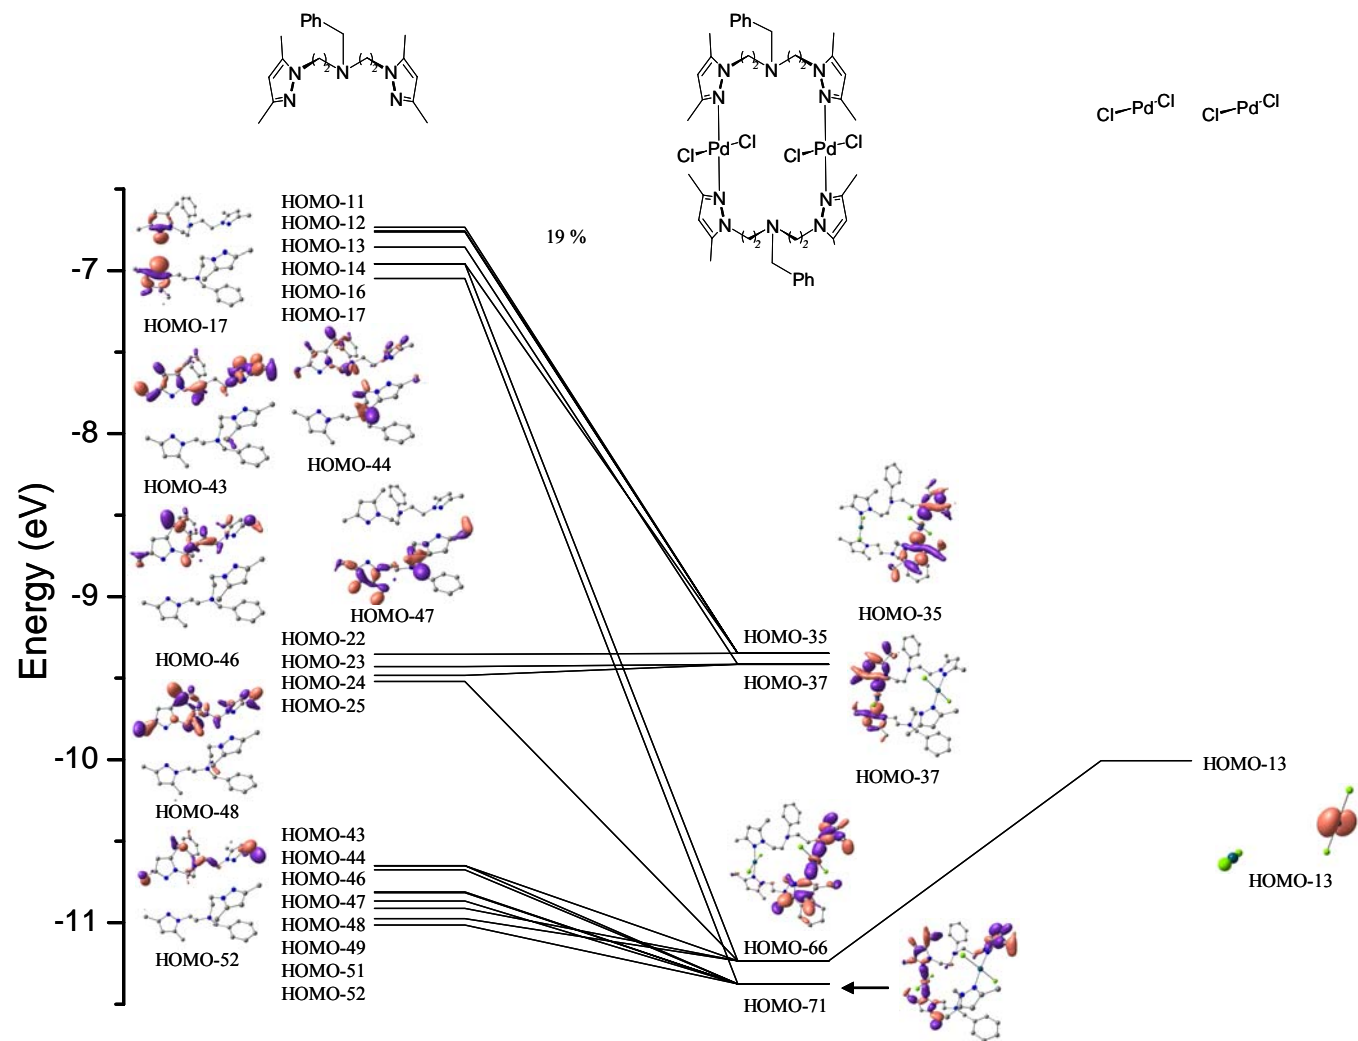

**Figure S8.** Detailed orbital interaction diagram showing major contributions to the pyrazole–palladium bond in **4**.

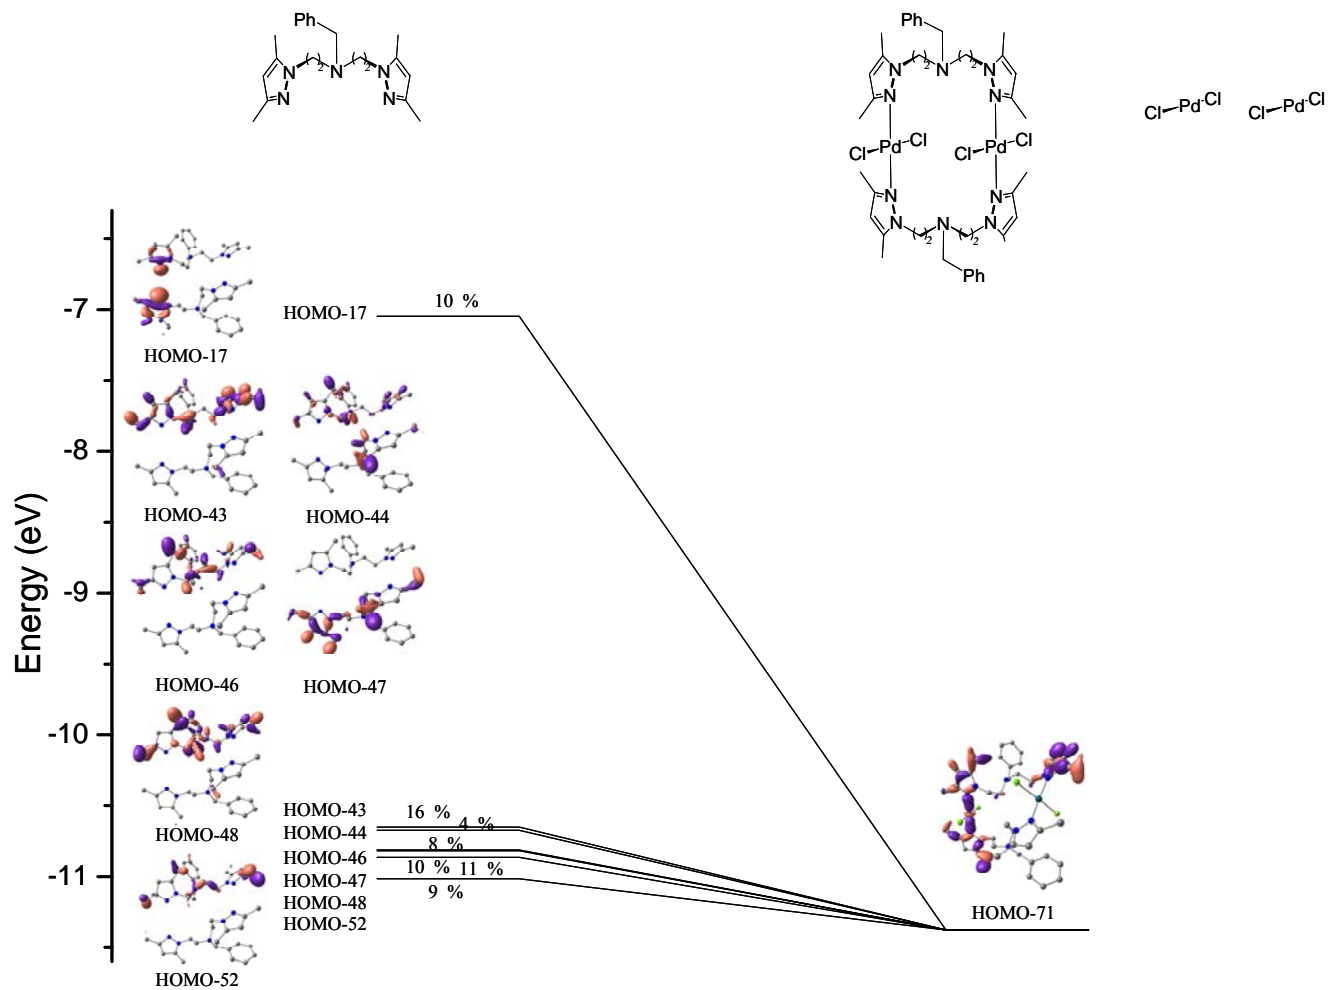

**Figure S9.** Simplified orbital interaction diagram showing major contributions to the pyrazole–palladium bonding orbital HOMO-71 in **4**.

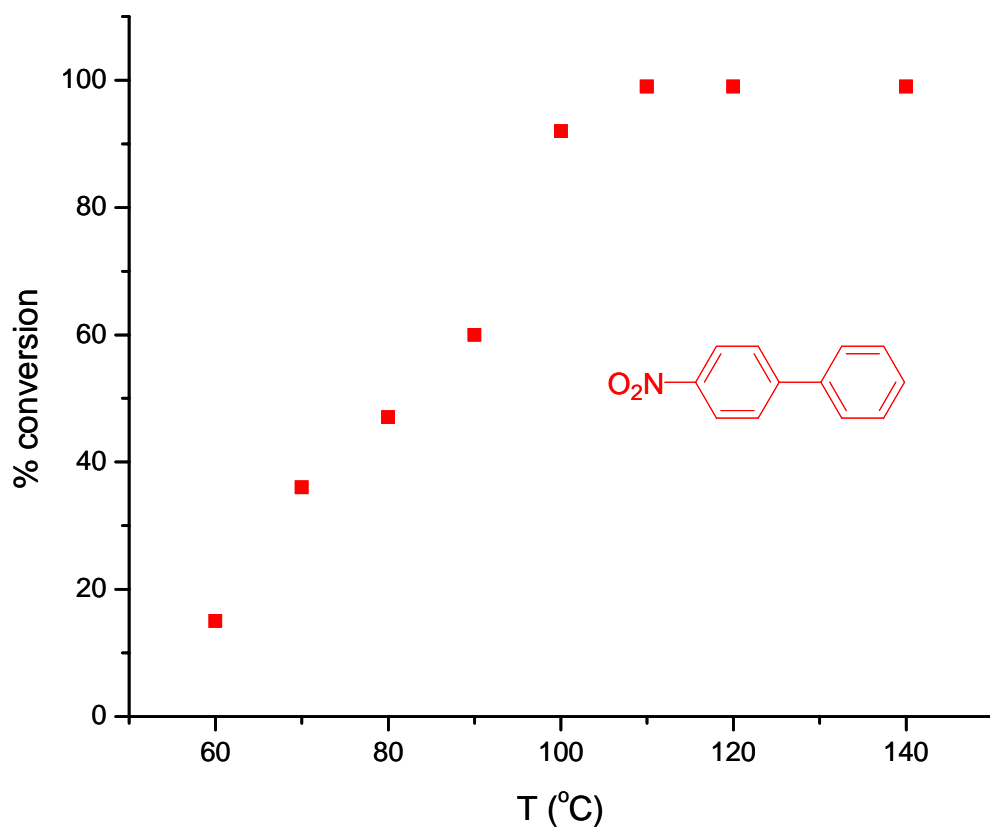

**Figure S10.** Temperature dependence of the coupling of *p*-NO<sub>2</sub>C<sub>6</sub>H<sub>4</sub>Cl with PhB(OH)<sub>2</sub> at 0.5 mol % loading of **3**.

**Table S1.** X-ray crystallographic data for palladium **1–4** complexes.

| compound                       | <b>1</b>                                                          | <b>2</b>                                                          | <b>3</b>                                                          | <b>4</b>                                                                        |
|--------------------------------|-------------------------------------------------------------------|-------------------------------------------------------------------|-------------------------------------------------------------------|---------------------------------------------------------------------------------|
| lattice                        | Orthorhombic                                                      | Triclinic                                                         | Orthorhombic                                                      | Triclinic                                                                       |
| formula                        | C <sub>22</sub> H <sub>30</sub> Cl <sub>2</sub> N <sub>6</sub> Pd | C <sub>25</sub> H <sub>35</sub> Cl <sub>2</sub> N <sub>7</sub> Pd | C <sub>19</sub> H <sub>24</sub> Cl <sub>2</sub> N <sub>5</sub> Pd | C <sub>44</sub> H <sub>61</sub> Cl <sub>4</sub> N <sub>11</sub> Pd <sub>2</sub> |
| formula weight                 | 555.82                                                            | 610.90                                                            | 499.73                                                            | 1098.64                                                                         |
| Space group                    | P 21 21 21                                                        | P-1                                                               | Pcmn <sup>[a]</sup>                                               | P-1                                                                             |
| a/Å                            | 11.6343(2)                                                        | 10.688(4)                                                         | 8.1966(2)                                                         | 12.8252(1)                                                                      |
| b/Å                            | 12.5462(3)                                                        | 12.313(2)                                                         | 13.6939(3)                                                        | 12.8252(1)                                                                      |
| c/Å                            | 16.8066(4)                                                        | 12.6717(12)                                                       | 18.0046(4)                                                        | 17.6659(2)                                                                      |
| α/°                            | 90                                                                | 110.583(14)                                                       | 90                                                                | 98.513(9)                                                                       |
| β/°                            | 90                                                                | 105.572(19)                                                       | 90                                                                | 111.107(8)                                                                      |
| γ/°                            | 90                                                                | 101.64(2)                                                         | 90                                                                | 107.462(8)                                                                      |
| V/Å <sup>3</sup>               | 2453.20(9)                                                        | 1420.4(6)                                                         | 2020.90(8)                                                        | 2476.5(3)                                                                       |
| Z                              | 4                                                                 | 2                                                                 | 4                                                                 | 2                                                                               |
| temperature (K)                | 123(2)                                                            | 123(2)                                                            | 123(2)                                                            | 123(2)                                                                          |
| radiation (λ, Å)               | 0.71073                                                           | 0.71073                                                           | 0.71073                                                           | 0.71073                                                                         |
| ρ (calcd.), g cm <sup>-3</sup> | 1.505                                                             | 1.428                                                             | 1.642                                                             | 1.473                                                                           |
| μ(Mo Kα), mm <sup>-1</sup>     | 0.995                                                             | 0.868                                                             | 1.197                                                             | 0.985                                                                           |
| θ max, deg.                    | 32.0906                                                           | 32.4264                                                           | 32.4887                                                           | 32.2149                                                                         |
| No. of data                    | 8066                                                              | 9378                                                              | 3588                                                              | 13369                                                                           |
| No. of parameters              | 259                                                               | 325                                                               | 138                                                               | 559                                                                             |
| Flack Parameter                | -0.02(3)                                                          |                                                                   |                                                                   |                                                                                 |
| R <sub>1</sub>                 | 0.0426                                                            | 0.0350                                                            | 0.0275                                                            | 0.0549                                                                          |
| wR <sub>2</sub>                | 0.0871                                                            | 0.0562                                                            | 0.0652                                                            | 0.1277                                                                          |
| GOF                            | 1.077                                                             | 0.823                                                             | 1.032                                                             | 0.956                                                                           |

<sup>[a]</sup> The reported space group Pcmn is a non-standard setting of Pmna.

The density functional theory calculations were performed for the palladium **1–4** complexes by using the GAUSSIAN 03<sup>[1]</sup> suite of quantum chemical programs.

**Table S2.** B3LYP/SDD, 6-31G(d) optimized coordinates of **1**.

Energy = -2100.5472514 hartree/particle.

|   |          |          |          |
|---|----------|----------|----------|
| N | -0.97522 | -1.50413 | 0.487914 |
| N | 0.225668 | -1.92987 | 0.006342 |
| N | 1.499391 | 0.000214 | -0.86528 |
| N | 0.217392 | 1.930913 | -0.00508 |
| N | -0.9811  | 1.501609 | 0.478973 |
| C | -2.60241 | -2.17716 | 2.230229 |
| H | -2.66508 | -1.21702 | 2.754865 |
| H | -2.70832 | -2.97702 | 2.968535 |
| H | -3.4398  | -2.22794 | 1.526607 |
| C | -1.30576 | -2.31691 | 1.497234 |
| C | -0.28685 | -3.2739  | 1.672803 |
| H | -0.26468 | -4.07066 | 2.40251  |
| C | 0.671941 | -3.00953 | 0.709007 |
| C | 1.959187 | -3.7153  | 0.413553 |
| H | 2.108452 | -4.51366 | 1.144916 |
| H | 2.821657 | -3.04162 | 0.466995 |
| H | 1.953342 | -4.17662 | -0.5818  |
| C | 0.848054 | -1.25182 | -1.14255 |
| H | 1.570438 | -1.96659 | -1.54377 |
| H | 0.051429 | -1.10248 | -1.87633 |
| C | 2.869049 | 0.002955 | -0.42403 |
| C | 3.195502 | 0.01871  | 0.948358 |
| C | 2.15395  | 0.040772 | 2.045313 |
| H | 2.220117 | 0.969347 | 2.625635 |
| H | 2.314155 | -0.78607 | 2.747304 |
| H | 1.138629 | -0.037   | 1.657325 |
| C | 4.552914 | 0.018355 | 1.310701 |
| H | 4.814285 | 0.028853 | 2.366455 |
| C | 5.557025 | 0.004323 | 0.349602 |
| H | 6.600872 | 0.004076 | 0.651888 |
| C | 5.222013 | -0.00999 | -1.00503 |
| H | 6.006053 | -0.02056 | -1.75787 |
| C | 3.88522  | -0.01107 | -1.41081 |
| C | 3.545178 | -0.0269  | -2.88455 |
| H | 4.456863 | -0.01504 | -3.48909 |
| H | 2.941055 | 0.838956 | -3.17984 |

|    |          |          |          |
|----|----------|----------|----------|
| H  | 2.973477 | -0.91855 | -3.16848 |
| C  | 0.844069 | 1.24861  | -1.14903 |
| H  | 0.049166 | 1.092618 | -1.88335 |
| H  | 1.564821 | 1.963533 | -1.55307 |
| C  | 1.937579 | 3.732521 | 0.386549 |
| H  | 2.804904 | 3.065841 | 0.449309 |
| H  | 2.079425 | 4.540203 | 1.109107 |
| H  | 1.93078  | 4.182487 | -0.61396 |
| C  | 0.654743 | 3.02081  | 0.687097 |
| C  | -0.30707 | 3.287717 | 1.647349 |
| H  | -0.29158 | 4.091696 | 2.369267 |
| C  | -1.31898 | 2.321834 | 1.479581 |
| C  | -2.61853 | 2.183422 | 2.207463 |
| H  | -3.45409 | 2.289293 | 1.507456 |
| H  | -2.70322 | 2.950403 | 2.982503 |
| H  | -2.7083  | 1.201035 | 2.683965 |
| Pd | -2.09719 | -0.00616 | -0.43854 |
| Cl | -3.30146 | -1.68749 | -1.48678 |
| Cl | -3.30666 | 1.665138 | -1.49717 |

**Table S3.** B3LYP/SDD, 6-31G(d) optimized coordinates of **2**.

Energy = -2139.8649961 hartree/particle.

|   |          |          |          |
|---|----------|----------|----------|
| N | -1.1728  | 1.500606 | 0.485306 |
| N | 0.006876 | 1.932972 | -0.04049 |
| N | 1.257412 | 0.001974 | -0.94241 |
| N | 0.009754 | -1.93179 | -0.04266 |
| N | -1.17311 | -1.50654 | 0.482047 |
| C | -2.74687 | 2.175065 | 2.274622 |
| H | -3.60688 | 2.306057 | 1.609224 |
| H | -2.79367 | 2.924805 | 3.06953  |
| H | -2.8304  | 1.182631 | 2.730769 |
| C | -1.47407 | 2.316265 | 1.50141  |
| C | -0.45663 | 3.281154 | 1.637097 |
| H | -0.41463 | 4.081314 | 2.362183 |
| C | 0.469757 | 3.018713 | 0.641415 |
| C | 1.741706 | 3.731073 | 0.298709 |
| H | 2.608439 | 3.061023 | 0.31776  |
| H | 1.914997 | 4.528608 | 1.025686 |
| H | 1.69572  | 4.194333 | -0.69469 |
| C | 0.596457 | 1.251541 | -1.20462 |
| H | -0.22033 | 1.098841 | -1.91509 |
| H | 1.305511 | 1.966508 | -1.62877 |
| C | 0.596835 | -1.24752 | -1.20631 |

|    |          |          |          |
|----|----------|----------|----------|
| H  | 1.305762 | -1.96107 | -1.63309 |
| H  | -0.22116 | -1.0939  | -1.91519 |
| C  | 1.752394 | -3.72295 | 0.294372 |
| H  | 1.707016 | -4.18739 | -0.69852 |
| H  | 1.930272 | -4.51899 | 1.021881 |
| H  | 2.616099 | -3.049   | 0.311529 |
| C  | 0.477728 | -3.01602 | 0.638253 |
| C  | -0.44798 | -3.28435 | 1.632803 |
| H  | -0.40271 | -4.0855  | 2.356607 |
| C  | -1.47024 | -2.32446 | 1.497743 |
| C  | -2.73825 | -2.18486 | 2.279506 |
| H  | -2.75785 | -1.24812 | 2.84849  |
| H  | -2.83996 | -3.01355 | 2.985977 |
| H  | -3.59969 | -2.18495 | 1.603904 |
| C  | 2.633978 | 0.001814 | -0.5237  |
| C  | 3.638114 | 0.001645 | -1.52391 |
| C  | 3.276872 | 0.001915 | -2.99268 |
| H  | 4.179303 | 0.001982 | -3.61108 |
| H  | 2.684188 | 0.880827 | -3.27286 |
| H  | 2.684143 | -0.87685 | -3.27323 |
| C  | 4.978242 | 0.001098 | -1.13922 |
| H  | 5.746964 | 0.000785 | -1.90954 |
| C  | 5.35972  | 0.000951 | 0.210227 |
| C  | 6.82054  | 0.001044 | 0.596685 |
| H  | 6.947294 | -0.00598 | 1.683598 |
| H  | 7.336532 | 0.88632  | 0.20474  |
| H  | 7.339919 | -0.87676 | 0.192726 |
| C  | 4.354047 | 0.00122  | 1.174526 |
| H  | 4.629172 | 0.001027 | 2.227699 |
| C  | 2.989509 | 0.001527 | 0.83893  |
| C  | 1.973979 | 0.000624 | 1.960263 |
| H  | 0.947768 | 0.007448 | 1.593877 |
| H  | 2.107808 | 0.877694 | 2.60485  |
| H  | 2.098929 | -0.88461 | 2.595499 |
| Pd | -2.32588 | -0.00144 | -0.39485 |
| Cl | -3.57375 | 1.677318 | -1.39603 |
| Cl | -3.57686 | -1.67501 | -1.4005  |

**Table S4.** B3LYP/SDD, 6-31G(d) optimized coordinates of **3**.

Energy = -2061.2262513 hartree/particle.

|   |          |          |          |
|---|----------|----------|----------|
| N | -0.73694 | -1.49678 | 0.356871 |
| N | 0.249352 | -1.90526 | -0.49061 |
| N | 1.136738 | -1.3E-05 | -1.80625 |

|   |          |          |          |
|---|----------|----------|----------|
| N | 0.249432 | 1.905201 | -0.49053 |
| N | -0.73661 | 1.496478 | 0.357133 |
| C | -1.69004 | -2.18164 | 2.539121 |
| H | -1.55301 | -1.24641 | 3.094163 |
| H | -1.57294 | -3.0127  | 3.240444 |
| H | -2.71088 | -2.19013 | 2.143785 |
| C | -0.70436 | -2.30686 | 1.420387 |
| C | 0.33248  | -3.24583 | 1.254435 |
| H | 0.608301 | -4.03502 | 1.939116 |
| C | 0.918926 | -2.97329 | 0.03033  |
| C | 2.061967 | -3.65261 | -0.65655 |
| H | 2.389738 | -4.50254 | -0.05274 |
| H | 2.920124 | -2.98194 | -0.78138 |
| H | 1.781674 | -4.0383  | -1.64423 |
| C | 0.422993 | -1.24547 | -1.79661 |
| H | 0.946438 | -1.97142 | -2.42517 |
| H | -0.58507 | -1.09986 | -2.19363 |
| C | 2.584765 | -1.6E-05 | -1.93756 |
| C | 0.423007 | 1.245455 | -1.79655 |
| H | -0.58506 | 1.099864 | -2.19355 |
| H | 0.946439 | 1.971426 | -2.4251  |
| C | 2.061789 | 3.652808 | -0.65664 |
| H | 2.920082 | 2.982293 | -0.78141 |
| H | 2.389389 | 4.502882 | -0.05294 |
| H | 1.781401 | 4.038318 | -1.64437 |
| C | 0.918912 | 2.973316 | 0.030343 |
| C | 0.332641 | 3.245698 | 1.254572 |
| H | 0.608452 | 4.034908 | 1.939238 |
| C | -0.70398 | 2.306526 | 1.420675 |
| C | -1.68944 | 2.181084 | 2.539579 |
| H | -2.71037 | 2.189953 | 2.144474 |
| H | -1.57201 | 3.011851 | 3.241201 |
| H | -1.5525  | 1.245611 | 3.094216 |
| C | 3.431077 | -3.1E-05 | -0.66325 |
| C | 4.828623 | -4.5E-05 | -0.79635 |
| C | 2.878039 | -3.3E-05 | 0.620957 |
| C | 5.653887 | -6.2E-05 | 0.326838 |
| C | 3.705405 | -5.2E-05 | 1.748794 |
| C | 5.092289 | -6.7E-05 | 1.607206 |
| H | 5.273774 | -4.2E-05 | -1.79019 |
| H | 1.800256 | -1.4E-05 | 0.742871 |
| H | 6.733731 | -7.6E-05 | 0.204045 |
| H | 3.258288 | -5.5E-05 | 2.7393   |
| H | 5.733064 | -8.3E-05 | 2.484674 |
| H | 2.866567 | -0.87394 | -2.54275 |
| H | 2.866581 | 0.873902 | -2.54275 |



|    |          |          |          |
|----|----------|----------|----------|
| Pd | -2.10586 | 0.000035 | -0.13297 |
| Cl | -3.60023 | -1.67545 | -0.71327 |
| Cl | -3.59982 | 1.67599  | -0.71295 |

**Table S5.** B3LYP/SDD, 6-31G(d) optimized coordinates of **4**.

Energy = -4279.7339465 hartree/particle.

|   |          |          |          |
|---|----------|----------|----------|
| N | -3.53407 | 1.399762 | 1.410156 |
| N | -2.29914 | 1.898826 | 1.69477  |
| N | -0.44771 | 2.980823 | -0.55666 |
| N | 3.3453   | 2.875467 | -0.90876 |
| N | 3.999458 | 2.103403 | 0.002489 |
| N | 3.219354 | -1.70766 | 1.340263 |
| N | 2.030958 | -2.35485 | 1.505082 |
| N | -0.03864 | -3.47182 | -0.76455 |
| N | -3.75984 | -2.86546 | -1.3639  |
| N | -4.49599 | -2.10624 | -0.50626 |
| C | -5.9054  | 1.95913  | 1.889528 |
| H | -6.22043 | 1.879565 | 0.843926 |
| H | -6.45713 | 2.776804 | 2.362246 |
| H | -6.17512 | 1.025521 | 2.396557 |
| C | -4.43383 | 2.213286 | 1.980627 |
| C | -3.75659 | 3.253549 | 2.63813  |
| H | -4.20105 | 4.061721 | 3.200803 |
| C | -2.40114 | 3.029387 | 2.440012 |
| C | -1.21542 | 3.805627 | 2.919646 |
| H | -0.5246  | 3.180838 | 3.497771 |
| H | -1.55314 | 4.620346 | 3.565523 |
| H | -0.65549 | 4.237493 | 2.083811 |
| C | -1.1043  | 1.268018 | 1.15     |
| H | -1.23709 | 0.191801 | 1.277151 |
| H | -0.25544 | 1.565772 | 1.76927  |
| C | -0.87269 | 1.600456 | -0.33309 |
| H | -0.14768 | 0.866636 | -0.72523 |
| H | -1.80882 | 1.430938 | -0.87257 |
| C | -0.9642  | 3.573386 | -1.79851 |
| H | -2.01768 | 3.27915  | -1.87206 |
| H | -0.47208 | 3.174541 | -2.70488 |
| C | -0.8702  | 5.088248 | -1.81273 |
| C | -1.44092 | 5.843302 | -0.77745 |
| H | -1.93388 | 5.326469 | 0.041303 |
| C | -1.38282 | 7.23608  | -0.79815 |
| H | -1.83289 | 7.807468 | 0.00964  |
| C | -0.75462 | 7.899272 | -1.85696 |

|   |          |          |          |
|---|----------|----------|----------|
| H | -0.71147 | 8.985027 | -1.87295 |
| C | -0.18863 | 7.159035 | -2.8948  |
| H | 0.296685 | 7.66496  | -3.72548 |
| C | -0.24637 | 5.761988 | -2.86889 |
| H | 0.188842 | 5.189063 | -3.68548 |
| C | 0.967993 | 3.222894 | -0.29264 |
| H | 1.216687 | 2.845053 | 0.704378 |
| H | 1.134949 | 4.305499 | -0.27377 |
| C | 1.969462 | 2.588414 | -1.29565 |
| H | 1.873455 | 1.501991 | -1.34477 |
| H | 1.828091 | 2.980797 | -2.30569 |
| C | 3.625982 | 5.02239  | -2.18401 |
| H | 3.54253  | 4.608921 | -3.19708 |
| H | 4.359321 | 5.83221  | -2.2157  |
| H | 2.654897 | 5.457676 | -1.9228  |
| C | 4.076444 | 3.984465 | -1.20482 |
| C | 5.244902 | 3.902048 | -0.46387 |
| H | 6.061614 | 4.609359 | -0.46598 |
| C | 5.161793 | 2.711189 | 0.277188 |
| C | 6.157668 | 2.122981 | 1.226308 |
| H | 5.68448  | 1.883285 | 2.184193 |
| H | 6.971305 | 2.832232 | 1.403972 |
| H | 6.587974 | 1.199906 | 0.821633 |
| C | 5.607965 | -2.06949 | 1.9132   |
| H | 5.950058 | -1.79913 | 0.909003 |
| H | 6.224917 | -2.89269 | 2.285193 |
| H | 5.761382 | -1.20411 | 2.568445 |
| C | 4.168748 | -2.47822 | 1.889454 |
| C | 3.573547 | -3.63936 | 2.409393 |
| H | 4.072914 | -4.45256 | 2.915769 |
| C | 2.215244 | -3.53607 | 2.149434 |
| C | 1.091373 | -4.46761 | 2.473496 |
| H | 0.37175  | -4.00816 | 3.162571 |
| H | 1.4891   | -5.36597 | 2.952461 |
| H | 0.55284  | -4.76036 | 1.566988 |
| C | 0.810376 | -1.80731 | 0.928466 |
| H | 0.891078 | -0.72518 | 1.037984 |
| H | -0.03024 | -2.1347  | 1.544879 |
| C | 0.61267  | -2.17546 | -0.55367 |
| H | 0.05299  | -1.3551  | -1.03576 |
| H | 1.59717  | -2.19183 | -1.02886 |
| C | 0.381374 | -4.1345  | -2.0126  |
| H | 0.364083 | -3.44576 | -2.87577 |
| H | -0.35762 | -4.91784 | -2.22163 |
| C | 1.75451  | -4.77095 | -1.90687 |
| C | 2.864825 | -4.21774 | -2.55226 |

|    |          |          |          |
|----|----------|----------|----------|
| H  | 2.752011 | -3.30867 | -3.13754 |
| C  | 4.125509 | -4.81131 | -2.43892 |
| H  | 4.978429 | -4.35895 | -2.9367  |
| C  | 4.285169 | -5.97293 | -1.68455 |
| H  | 5.263633 | -6.43812 | -1.59834 |
| C  | 3.180351 | -6.53815 | -1.0393  |
| H  | 3.296955 | -7.44701 | -0.45433 |
| C  | 1.927268 | -5.93908 | -1.14959 |
| H  | 1.069555 | -6.37961 | -0.64587 |
| C  | -1.4837  | -3.46782 | -0.5454  |
| H  | -1.70388 | -3.09313 | 0.459337 |
| H  | -1.83145 | -4.5078  | -0.57163 |
| C  | -2.33107 | -2.64572 | -1.55678 |
| H  | -2.15993 | -1.57181 | -1.45798 |
| H  | -2.09583 | -2.9259  | -2.58758 |
| C  | -3.99339 | -4.87952 | -2.85021 |
| H  | -3.66977 | -4.40259 | -3.78367 |
| H  | -4.78398 | -5.59224 | -3.09769 |
| H  | -3.14328 | -5.44789 | -2.45501 |
| C  | -4.51652 | -3.87957 | -1.86764 |
| C  | -5.77986 | -3.74972 | -1.31402 |
| H  | -6.6364  | -4.37994 | -1.50478 |
| C  | -5.72904 | -2.62787 | -0.46935 |
| C  | -6.81906 | -2.02149 | 0.356764 |
| H  | -6.51782 | -1.94731 | 1.407116 |
| H  | -7.72257 | -2.63501 | 0.295793 |
| H  | -7.05967 | -1.01327 | 0.001893 |
| Pd | -3.91618 | -0.36417 | 0.422129 |
| Pd | 3.486213 | 0.206444 | 0.621441 |
| Cl | -3.18813 | -1.59671 | 2.29814  |
| Cl | -4.54475 | 0.838868 | -1.50261 |
| Cl | 2.584018 | 1.095949 | 2.615575 |
| Cl | 4.253979 | -0.6393  | -1.43335 |

**Table S6.** Natural charge analyses of the palladium **1** and **2** complexes.

| compound/specie                                                                                | N <sub>pyrazole</sub> | Pd    | compound/specie                                                                                 | N <sub>pyrazole</sub> | Pd    |
|------------------------------------------------------------------------------------------------|-----------------------|-------|-------------------------------------------------------------------------------------------------|-----------------------|-------|
| 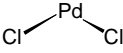              |                       | 0.654 |                |                       | 0.654 |
|               | -0.296<br>-0.296      |       |               | -0.296<br>-0.296      |       |
| <br><b>1</b> | -0.319<br>-0.319      | 0.621 | <br><b>2</b> | -0.319<br>-0.319      | 0.622 |

**Table S7.** Natural charge analyses of the palladium **3** and **4** complexes.

| compound/specie                                                                     | N <sub>pyrazole</sub> | Pd    | compound/specie                                                                                                                                                      | N <sub>pyrazole</sub>                | Pd             |
|-------------------------------------------------------------------------------------|-----------------------|-------|----------------------------------------------------------------------------------------------------------------------------------------------------------------------|--------------------------------------|----------------|
| 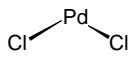   |                       | 0.654 |   |                                      | 0.975<br>0.975 |
|    | -0.297<br>-0.297      |       |                                                                                    | -0.319<br>-0.313<br>-0.320<br>-0.309 |                |
|  | -0.319<br>-0.319      | 0.621 |                                                                                   | -0.305<br>-0.300<br>-0.306<br>-0.296 | 0.651<br>0.651 |
| <b>3</b>                                                                            |                       |       | <b>4</b>                                                                                                                                                             |                                      |                |

**Table S8.** Mulliken charge analyses of the palladium **1** and **2** complexes.

| compound/specie                                                                                | N <sub>pyrazole</sub> | Pd    | compound/specie                                                                                 | N <sub>pyrazole</sub> | Pd    |
|------------------------------------------------------------------------------------------------|-----------------------|-------|-------------------------------------------------------------------------------------------------|-----------------------|-------|
| 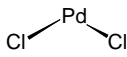              |                       | 0.269 |                |                       | 0.269 |
|               | -0.285<br>-0.286      |       |               | -0.286<br>-0.285      |       |
| <br><b>1</b> | -0.319<br>-0.319      | 0.022 | <br><b>2</b> | -0.319<br>-0.319      | 0.023 |

**Table S9.** Mulliken charge analyses of the palladium **3** and **4** complexes.

| compound/specie                                                                    | N <sub>pyrazole</sub> | Pd    | compound/specie                                                                                                                                                      | N <sub>pyrazole</sub>                | Pd               |
|------------------------------------------------------------------------------------|-----------------------|-------|----------------------------------------------------------------------------------------------------------------------------------------------------------------------|--------------------------------------|------------------|
| 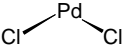  |                       | 0.269 |   |                                      | 0.448<br>0.448   |
|   | -0.286<br>-0.286      |       |                                                                                    | -0.315<br>-0.309                     |                  |
|                                                                                    |                       |       |                                                                                    | -0.315<br>-0.307                     |                  |
|  | -0.320<br>-0.320      | 0.027 |                                                                                   | -0.306<br>-0.298<br>-0.306<br>-0.295 | -0.006<br>-0.002 |
| <b>3</b>                                                                           |                       |       | <b>4</b>                                                                                                                                                             |                                      |                  |

**Table S10.** Electronic configuration of Pd in the palladium **1** and **2** complexes.

| compound/specie                                                                   | 5s   | 4d   | 5p   | 6p   | 6d   | 7p   | compound/specie                                                                     | 5s   | 4d   | 5p   | 6p   | 6d   | 7p   |
|-----------------------------------------------------------------------------------|------|------|------|------|------|------|-------------------------------------------------------------------------------------|------|------|------|------|------|------|
| Pd <sup>2+</sup>                                                                  |      | 8.00 |      |      |      |      | Pd <sup>2+</sup>                                                                    |      | 8.00 |      |      |      |      |
| 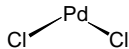 | 0.28 | 9.03 | 0.03 |      |      |      |  | 0.28 | 9.03 | 0.03 |      |      |      |
|  | 0.42 | 8.92 |      | 0.01 | 0.01 | 0.01 |  | 0.42 | 8.92 |      | 0.01 | 0.01 | 0.01 |



**Table S11.** Electronic configuration of Pd in the palladium **3** and **4** complexes.

| compound/specie                                                                   | 5s   | 4d   | 5p   | 6p   | 6d   | 7p   | compound/specie                                                                     | 5s   | 4d   | 5p   | 5d   | 6p   | 6d   |
|-----------------------------------------------------------------------------------|------|------|------|------|------|------|-------------------------------------------------------------------------------------|------|------|------|------|------|------|
| Pd <sup>2+</sup>                                                                  |      | 8.00 |      |      |      |      | Pd <sup>2+</sup>                                                                    |      | 8.00 |      |      |      |      |
| 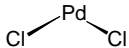 | 0.28 | 9.03 | 0.03 |      |      |      |  | 0.06 | 8.91 | 0.04 |      |      |      |
|  | 0.42 | 8.92 |      | 0.01 | 0.01 | 0.01 |  | 0.41 | 8.91 |      |      | 0.01 | 0.01 |
| <b>3</b>                                                                          |      |      |      |      |      |      | <b>4</b>                                                                            | 0.41 | 8.90 |      | 0.01 | 0.01 | 0.01 |

**Table S12.** Bond distance & bond energy of Pd-N<sub>pyrazole</sub> in **1–4**.

| compound                                                                                        | d(Pd-N <sub>pyrazole</sub> )<br>(Å) | D <sub>e</sub> (Pd-N <sub>pyrazole</sub> )<br>(kcal/mol) |
|-------------------------------------------------------------------------------------------------|-------------------------------------|----------------------------------------------------------|
| 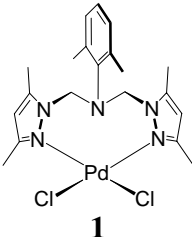<br><b>1</b>   | 2.09                                | 41.98                                                    |
| <br><b>2</b>   | 2.09                                | 42.05                                                    |
| <br><b>3</b> | 2.09                                | 41.87                                                    |
| <br><b>4</b> | 2.06                                | 50.20                                                    |

**Table S13.** Selected results for Suzuki–Miyaura cross-coupling reaction of chlorides catalyzed by PdCl<sub>2</sub> and by **3** under Hg(0) conditions.

| entry | Reagent <sup>[a]</sup>                                                               | reagent <sup>[a]</sup>                                                                | cross-coupled product                                                                 | yield <sup>[b]</sup> |                        |               |
|-------|--------------------------------------------------------------------------------------|---------------------------------------------------------------------------------------|---------------------------------------------------------------------------------------|----------------------|------------------------|---------------|
|       |                                                                                      |                                                                                       |                                                                                       | PdCl <sub>2</sub>    | (COD)PdCl <sub>2</sub> | Hg(0)<br>drop |
| 1     | 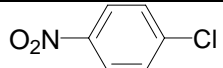   |    |    | >99                  | 91                     | >99           |
| 2     |    |    |    | 77                   | 51                     | >99           |
| 3     |    |    |    | 78                   | 86                     | >99           |
| 4     |    |    |    | 26                   | 39                     | >99           |
| 5     |    |    |    | 67                   | 49                     | >99           |
| 6     |    |    |    | 62                   | 24                     | >99           |
| 7     |    |    |    | 15                   | 15                     | 69            |
| 8     |   |   |   | 41                   | 12                     | 70            |
| 9     |  |  |  | 11                   | 10                     | 29            |
| 10    |  |  |  | 4                    | 2                      | 10            |
| 11    |  |  |  | 14                   | 13                     | 15            |
| 12    |  |  |  | 32                   | 49                     | >99           |
| 13    |  |  |  | 0                    | 0                      | 15            |

<sup>[a]</sup> Reaction conditions: 1.00 mmol of aryl chloride, 1.20 mmol of boronic acid, 1.50 mmol of Cs<sub>2</sub>CO<sub>3</sub>, 1.50 mmol of TBAB, 2 mol % of PdCl<sub>2</sub> or (COD)PdCl<sub>2</sub> or **3** in 8 mL of DMF:H<sub>2</sub>O (9:1), at 120 °C for 5 hours. <sup>[b]</sup> The yields (%) were determined by GC using diethylene glycol di-n-butyl ether as an internal standard.

## References

- [1]. GAUSSIAN 03: Gaussian 03, Revision C.02, M. J. Frisch, G. W. Trucks, H. B. Schlegel, G. E. Scuseria, M. A. Robb, J. R. Cheeseman, J. A. Montgomery, Jr., T. Vreven, K. N. Kudin, J. C. Burant, J. M. Millam, S. S. Iyengar, J. Tomasi, V. Barone, B. Mennucci, M. Cossi, G. Scalmani, N. Rega, G. A. Petersson, H. Nakatsuji, M. Hada, M. Ehara, K. Toyota, R. Fukuda, J. Hasegawa, M. Ishida, T. Nakajima, Y. Honda, O. Kitao, H. Nakai, M. Klene, X. Li, J. E. Knox, H. P. Hratchian, J. B. Cross, C. Adamo, J. Jaramillo, R. Gomperts, R. E. Stratmann, O. Yazyev, A. J. Austin, R. Cammi, C. Pomelli, J. W. Ochterski, P. Y. Ayala, K. Morokuma, G. A. Voth, P. Salvador, J. J. Dannenberg, V. G. Zakrzewski, S. Dapprich, A. D. Daniels, M. C. Strain, O. Farkas, D. K. Malick, A. D. Rabuck, K. Raghavachari, J. B. Foresman, J. V. Ortiz, Q. Cui, A. G. Baboul, S. Clifford, J. Cioslowski, B. B. Stefanov, G. Liu, A. Liashenko, P. Piskorz, I. Komaromi, R. L. Martin, D. J. Fox, T. Keith, M. A. Al-Laham, C. Y. Peng, A. Nanayakkara, M. Challacombe, P. M. W. Gill, B. Johnson, W. Chen, M. W. Wong, C. Gonzalez, J. A. Pople, Gaussian, Inc., Wallingford CT, 2004.
